# Supplementary material
Source: PubMed Central journal article supplement (PMC10502938)
Supplement: NIHMS1919659-supplement-Supplementary_Figures_and_Tables.pdf [file NIHMS1919659-supplement-Supplementary_Figures_and_Tables.pdf]

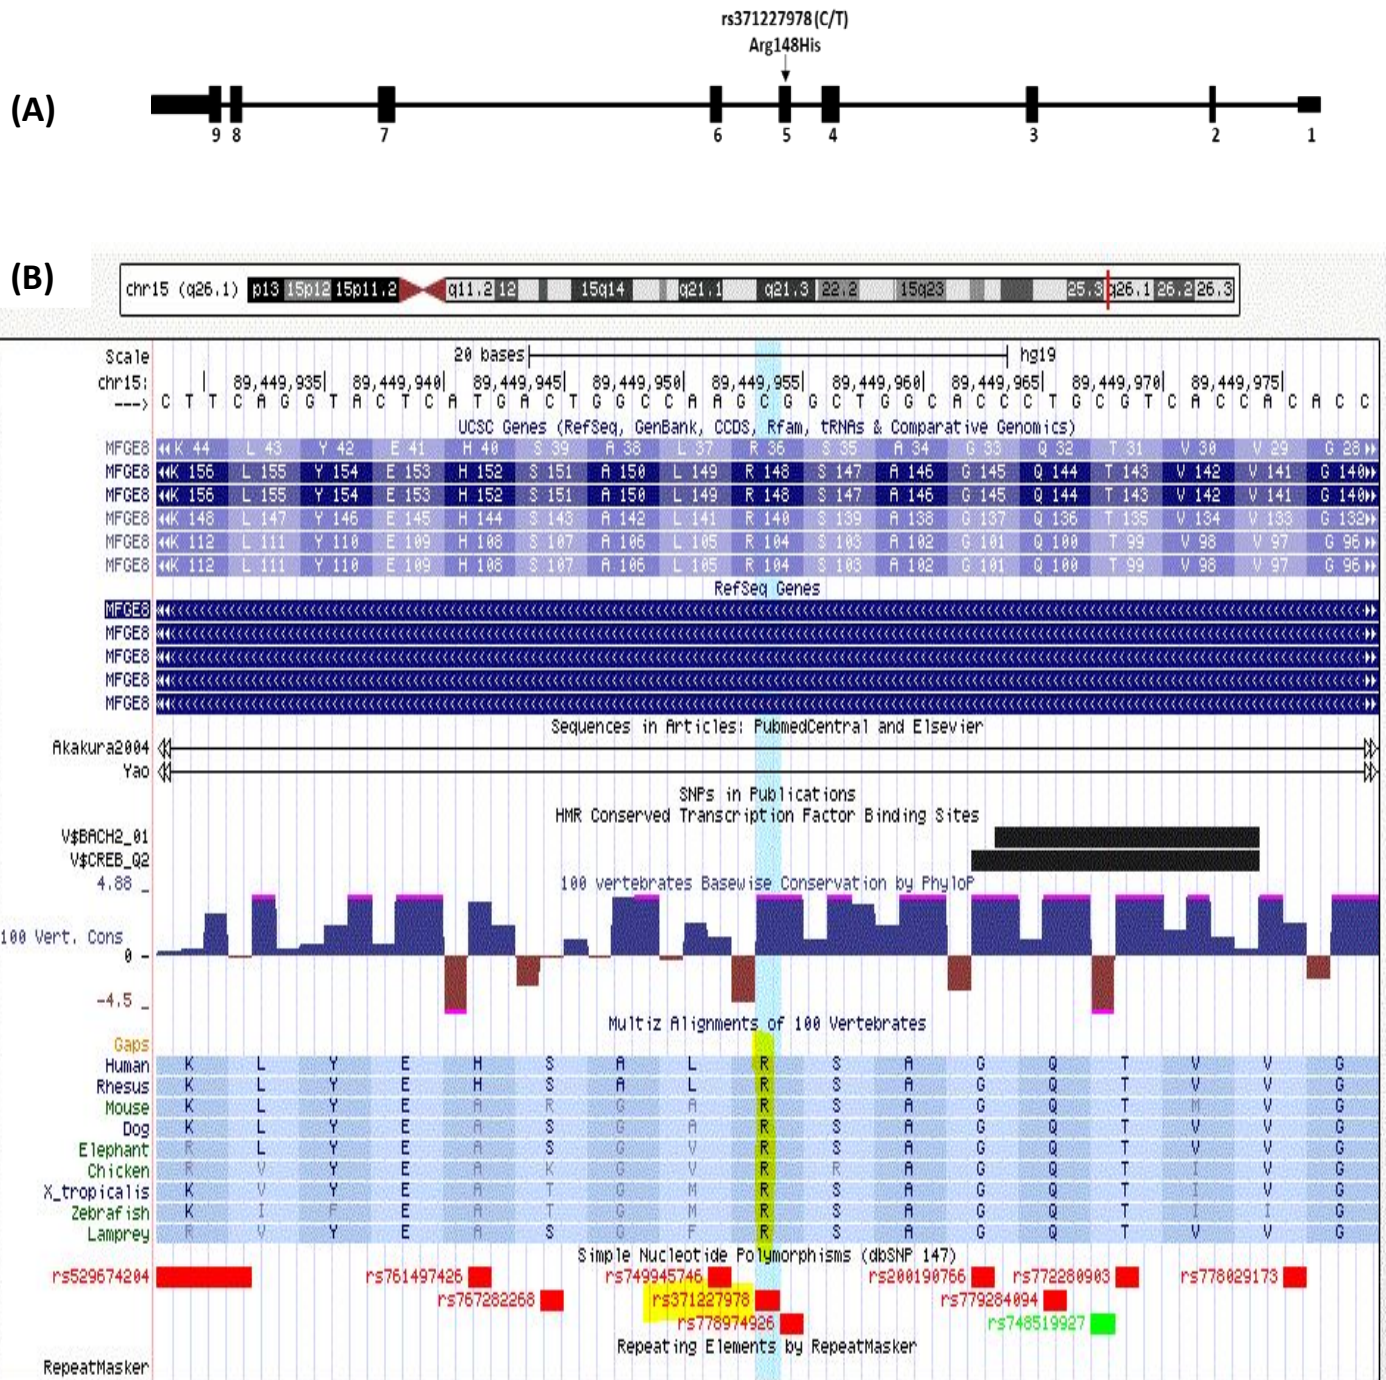

**Supplementary Figure 1.** (A) Identification of the rare missense variant rs371227978 (C/T: Arg148His) located on codon 148 of the fifth exon of the *MFGE8* gene by exome sequencing of AIDHS families with T2DM. Black rectangles represent the exons, and the horizontal line indicates non-coding sequence.

(B) Physical map of the Chromosome 15 region showing *MFGE8* gene location at chromosome position 15q25. Lower light blue rectangle is the data from BLAST showing sequence alignment of the portion of the *MFGE8* gene across different species surrounding Arg148His variant (rs371227978) highlighted in yellow. The yellow highlighted vertical bar indicates amino acid Arginine to be highly conserved among species (<https://genome.ucsc.edu/cgi/MFGE8>).

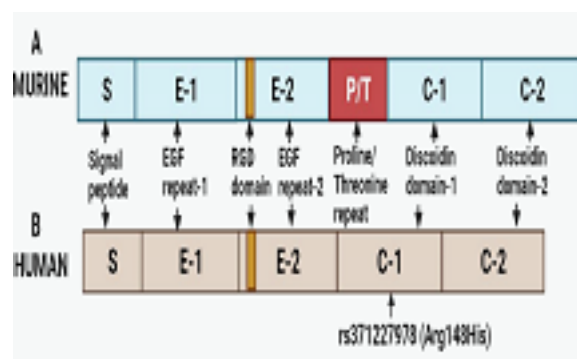

**Supplementary Figure 2.** Structural comparison of the functional domains of murine (A) human (B) Mfge8. The N-terminal site of Mfge8 has two EGF like domains, while the C-terminal site has two discoidin like domains (C1 and C2) with sequence similarity to blood coagulation factor V/VIII. The murine Mfge8 has additional Proline/Threonine repeat domain and has 57.7% similarity with human Mfge8. The variant rs371227978(Arg148His) resides on the C1 domain.

## Supplementary Tables

**Table1S: Exome sequencing identified 293 of 469 key genes in four major T2D-related pathways showing excess of rare variants among T2D patients**

| Pathways            | <i>P</i> -value | Genes with mutations | Genes in the pathway |
|---------------------|-----------------|----------------------|----------------------|
| Insulin signaling   | 5.50E-15        | 100                  | 161                  |
| Glucose Transport   | 4.30E-14        | 41                   | 48                   |
| G-protein signaling | 1.10E-10        | 60                   | 92                   |
| MAPK signaling      | 1.90E-09        | 92                   | 168                  |

**Table 2S: Correlations between Cardiometabolic traits, *MFGE8* genotypes and serum Mfge8 concentrations**

|                              |                     | T2DM | FBG             | TG                            | BMI                          | <i>MFGE8</i><br>Genotype | Serum Mfge8<br>Conc. |
|------------------------------|---------------------|------|-----------------|-------------------------------|------------------------------|--------------------------|----------------------|
| <b>T2DM</b>                  | Pearson Correlation | 1    | .637**          | .146**                        | .126**                       | .040                     | .381**               |
|                              | Sig. (2-tailed)     |      | <b>&lt;.001</b> | <b>2.91 ×10<sup>-18</sup></b> | <b>2.87×10<sup>-16</sup></b> | <b>.010</b>              | <b>.001</b>          |
| <b>FBG (mg/dL)</b>           | Pearson Correlation |      | 1               | .207**                        | .094**                       | .014                     | .364**               |
|                              | Sig. (2-tailed)     |      |                 | <b>1.99×10<sup>-30</sup></b>  | <b>1.73×10<sup>-8</sup></b>  | .396                     | <b>.002</b>          |
| <b>TG (mg/dL)</b>            | Pearson Correlation |      |                 | 1                             | .146**                       | .016                     | .331**               |
|                              | Sig. (2-tailed)     |      |                 |                               | <b>4.64×10<sup>-18</sup></b> | .346                     | <b>.005</b>          |
| <b>BMI</b>                   | Pearson Correlation |      |                 |                               | 1                            | -.015                    | -.098                |
|                              | Sig. (2-tailed)     |      |                 |                               |                              | .345                     | .398                 |
| <b>MFGE8<br/>Genotype</b>    | Pearson Correlation |      |                 |                               |                              | 1                        | .215                 |
|                              | Sig. (2-tailed)     |      |                 |                               |                              |                          | .058                 |
| <b>Serum Mfge8<br/>Conc.</b> | Pearson Correlation |      |                 |                               |                              |                          | 1                    |
|                              | Sig. (2-tailed)     |      |                 |                               |                              |                          |                      |

\*\*Correlation is significant at the 0.01 level (2-tailed);serum Mfge8 measures were available in a subset of samples including 39 T2DM cases and age- and gender matched 39 controls; Bivariate Pearson's correlation was calculated using SPSS Vs. 19.

Table 3S. Distribution of *MFG8* variant (rs371227978) in major global populations in Exome Aggregation Consortium

| Population             | Allele Count | Allele Number | Number of Homozygotes | Allele Frequency |
|------------------------|--------------|---------------|-----------------------|------------------|
| South Asian            | 175          | 16512         | 3                     | 0.0106           |
| European (Non-Finnish) | 2            | 66722         | 0                     | 2.998e-05        |
| African                | 0            | 10406         | 0                     | 0                |
| East Asian             | 0            | 8652          | 0                     | 0                |
| European (Finnish)     | 0            | 6614          | 0                     | 0                |
| Latino                 | 0            | 11574         | 0                     | 0                |
| Other                  | 0            | 906           | 0                     | 0                |
| <b>Total</b>           | <b>177</b>   | <b>121386</b> | <b>3</b>              | <b>0.001458</b>  |
